# Supplementary material for: Relapsed Classic E-Cadherin ( CDH1 )–Mutated Invasive Lobular Breast Cancer Shows a High Frequency of HER2 ( ERBB2 ) Gene Mutations
Source: Oxford University Press journal article supplement (doi:10.1158/1078-0432.ccr-13-0295), 2013-04-10
Supplement: 10780432ccr130295-sup-108515_2_supp_1921363_mknj26.xlsx [file 10780432ccr130295-sup-108515_2_supp_1921363_mknj26.xlsx]

## Sheet: Sheet3
Supplemental Table 1. Mutant Allele Frequencies of the Mutated Genes in 22 cases of ILC
Case #	Gene	Alteration	Mutant allele Frequency (%)
1	CDH1	Y37fs*1	95
1	TP53	E286K	96
2	CDH1	T823fs*23	12
2	PIK3CA	H1047R	17
3	CDH1	1009_1029delAGAGTTTCCCTACGTATACCCTG	12
3	TP53	D259Y	19
4	CDH1	I594fs*19	33
4	PIK3CA	E545K	41
4	TP53	R280K	35
4	TP53	E285K	18
5	CDH1	E167*	13
5	PIK3CA	H1047R	14
6	CDH1	L355fs*1	14
6	PIK3CA	N1044K	16
7	CDH1	A348fs*8	44
7	ERBB2	L755S	38
7	TP53	G245V	45
8	CDH1	splice site 532-1G>T	9
9	ERBB2	A775_G776insYVMA	19
9	ERBB2	R1153*	21
9	CDH1	A719fs*29	32
10	CDH1	E763*	9
10	PIK3CA	H1047L	9
11	CDH1	I650fs*13	45
12	CDH1	D337_L343del+splice	71
12	TP53	D259Y	84
13	CDH1	P309fs*29	60
14	CDH1	K653*	34
14	PIK3CA	H419_P421>T	13
15	CDH1	T40fs*19	47
16	CDH1	E388*	38
16	PIK3CA	E542R	20
17	CDH1	L343R (novel)	45
17	ERBB2	P780_Y781insGSP	17
18	PIK3CA	H1047R	26
18	CDH1	Q23*	29
19	CDH1	Q511fs*10	31
20	CDH1	L731fs*39	69
21	CDH1	A408V	48
21	TP53	R175H	44
22	CDH1	K314fs*4	21
22	ERBB2	S310F	5
22	ERBB2	V842l	3
